# Supplementary material
Source: Springer Nature journal article supplement (https://www.springermedizin.de/resource/supplementary/12874_2010_564_MOESM1_ESM.pdf/9432462)

$I^2$  with 90% reference interval

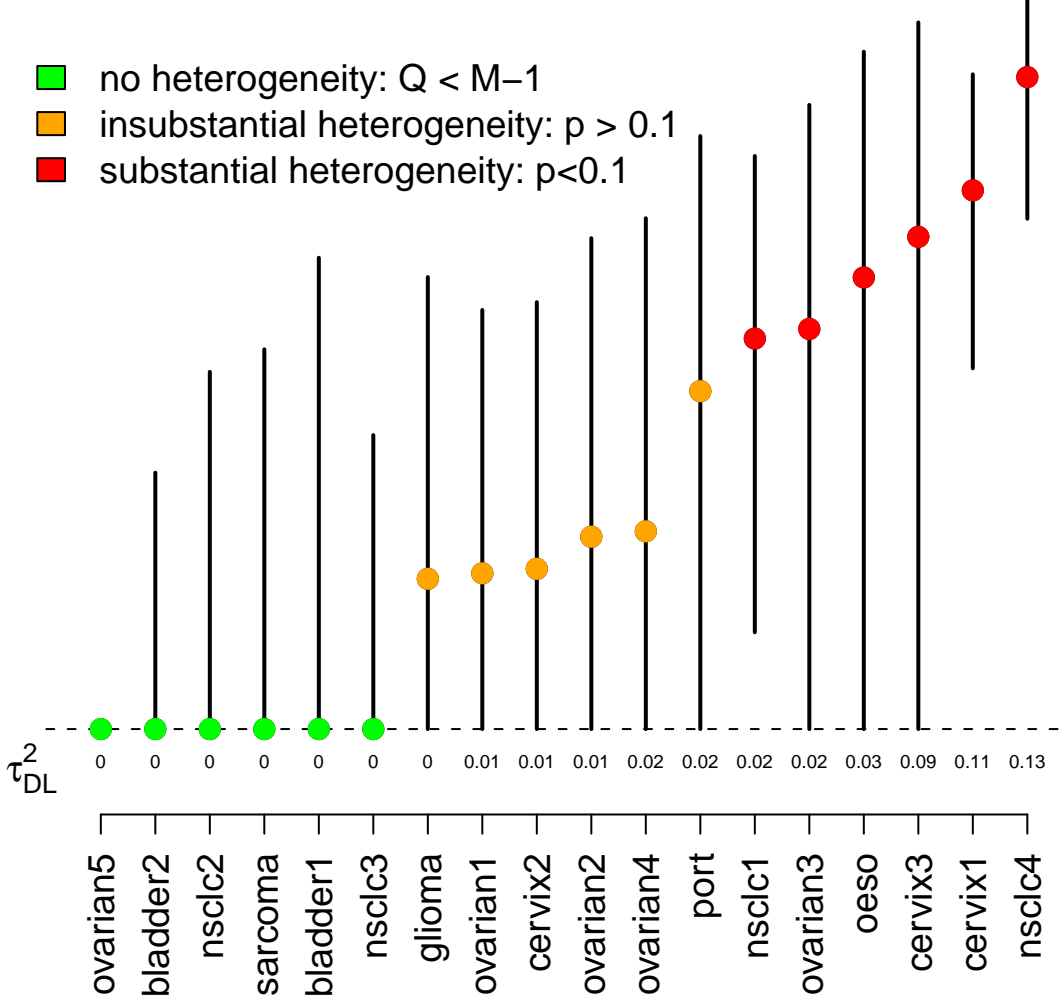

Supplement: MOESM1 [file 9432462]
